# Supplementary material for: Autofluorescence imaging permits label-free cell type assignment and reveals the dynamic formation of airway secretory cell associated antigen passages (SAPs)
Source: eLife journal article supplement (doi:10.7554/elife.84375), 2023-03-30
Supplement: supp [file elife-84375-supp-v1.zip]

Archive with 13 entries (13 files):
- elife_poa_e84375_Figure_1_figure_supplement_1.pdf
- elife_poa_e84375_Figure_2_figure_supplement_1.pdf
- elife_poa_e84375_Figure_3_figure_supplement_1.pdf
- elife_poa_e84375_Figure_3_figure_supplement_2.pdf
- elife_poa_e84375_Figure_3_figure_supplement_3.pdf
- elife_poa_e84375_Figure_3_figure_supplement_4.pdf
- elife_poa_e84375_Figure_5_figure_supplement_1.pdf
- elife_poa_e84375_Figure_5_figure_supplement_2.pdf
- elife_poa_e84375_Figure_3_source_data_1.xlsx
- elife_poa_e84375_Figure_4_source_data_1.docx
- elife_poa_e84375_Figure_5_video_1.mp4
- elife_poa_e84375_Figure_5_video_2.avi
- elife_poa_e84375_Figure_5_video_3.avi
