# Supplementary material for: Autofluorescence imaging permits label-free cell type assignment and reveals the dynamic formation of airway secretory cell associated antigen passages (SAPs)
Source: eLife journal article supplement (doi:10.7554/elife.84375), 2023-03-30
Supplement: supp [file elife-84375-supp-v1.zip]

**Figure 3 Supplement 3**

**i** K-nearest Neighbors

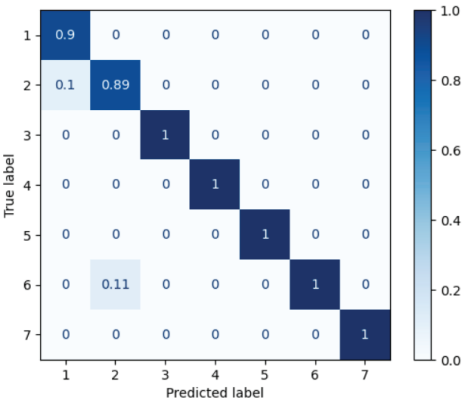

Training set Accuracy: 0.94  
Test set Accuracy: 0.96  
Matthews Correlation: 0.95

**ii** Multinomial Logistic Regression

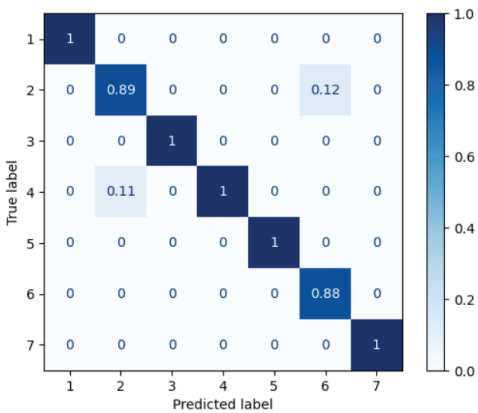

Training set Accuracy: 0.98  
Test set Accuracy: 0.96  
Matthews Correlation: 0.95

**iii** XGBoost

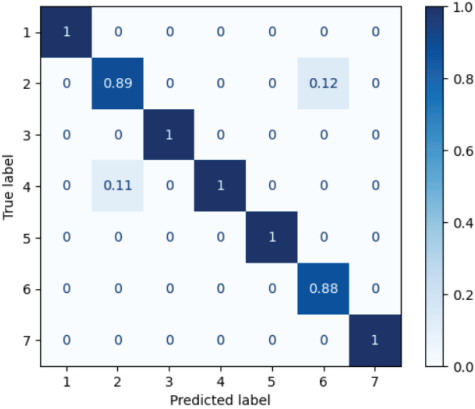

Training set Accuracy: 1.00  
Test set Accuracy: 0.92  
Matthews Correlation: 0.91
