# Supplementary material for: Autofluorescence imaging permits label-free cell type assignment and reveals the dynamic formation of airway secretory cell associated antigen passages (SAPs)
Source: eLife journal article supplement (doi:10.7554/elife.84375), 2023-03-30

**Figure 5 Supplement 2**

CD11c APC

FITC-Dextran (A-B)  
FITC-Ovalbumin (C-D)

APC - SAP  
Association

XZ Optical Cross Section

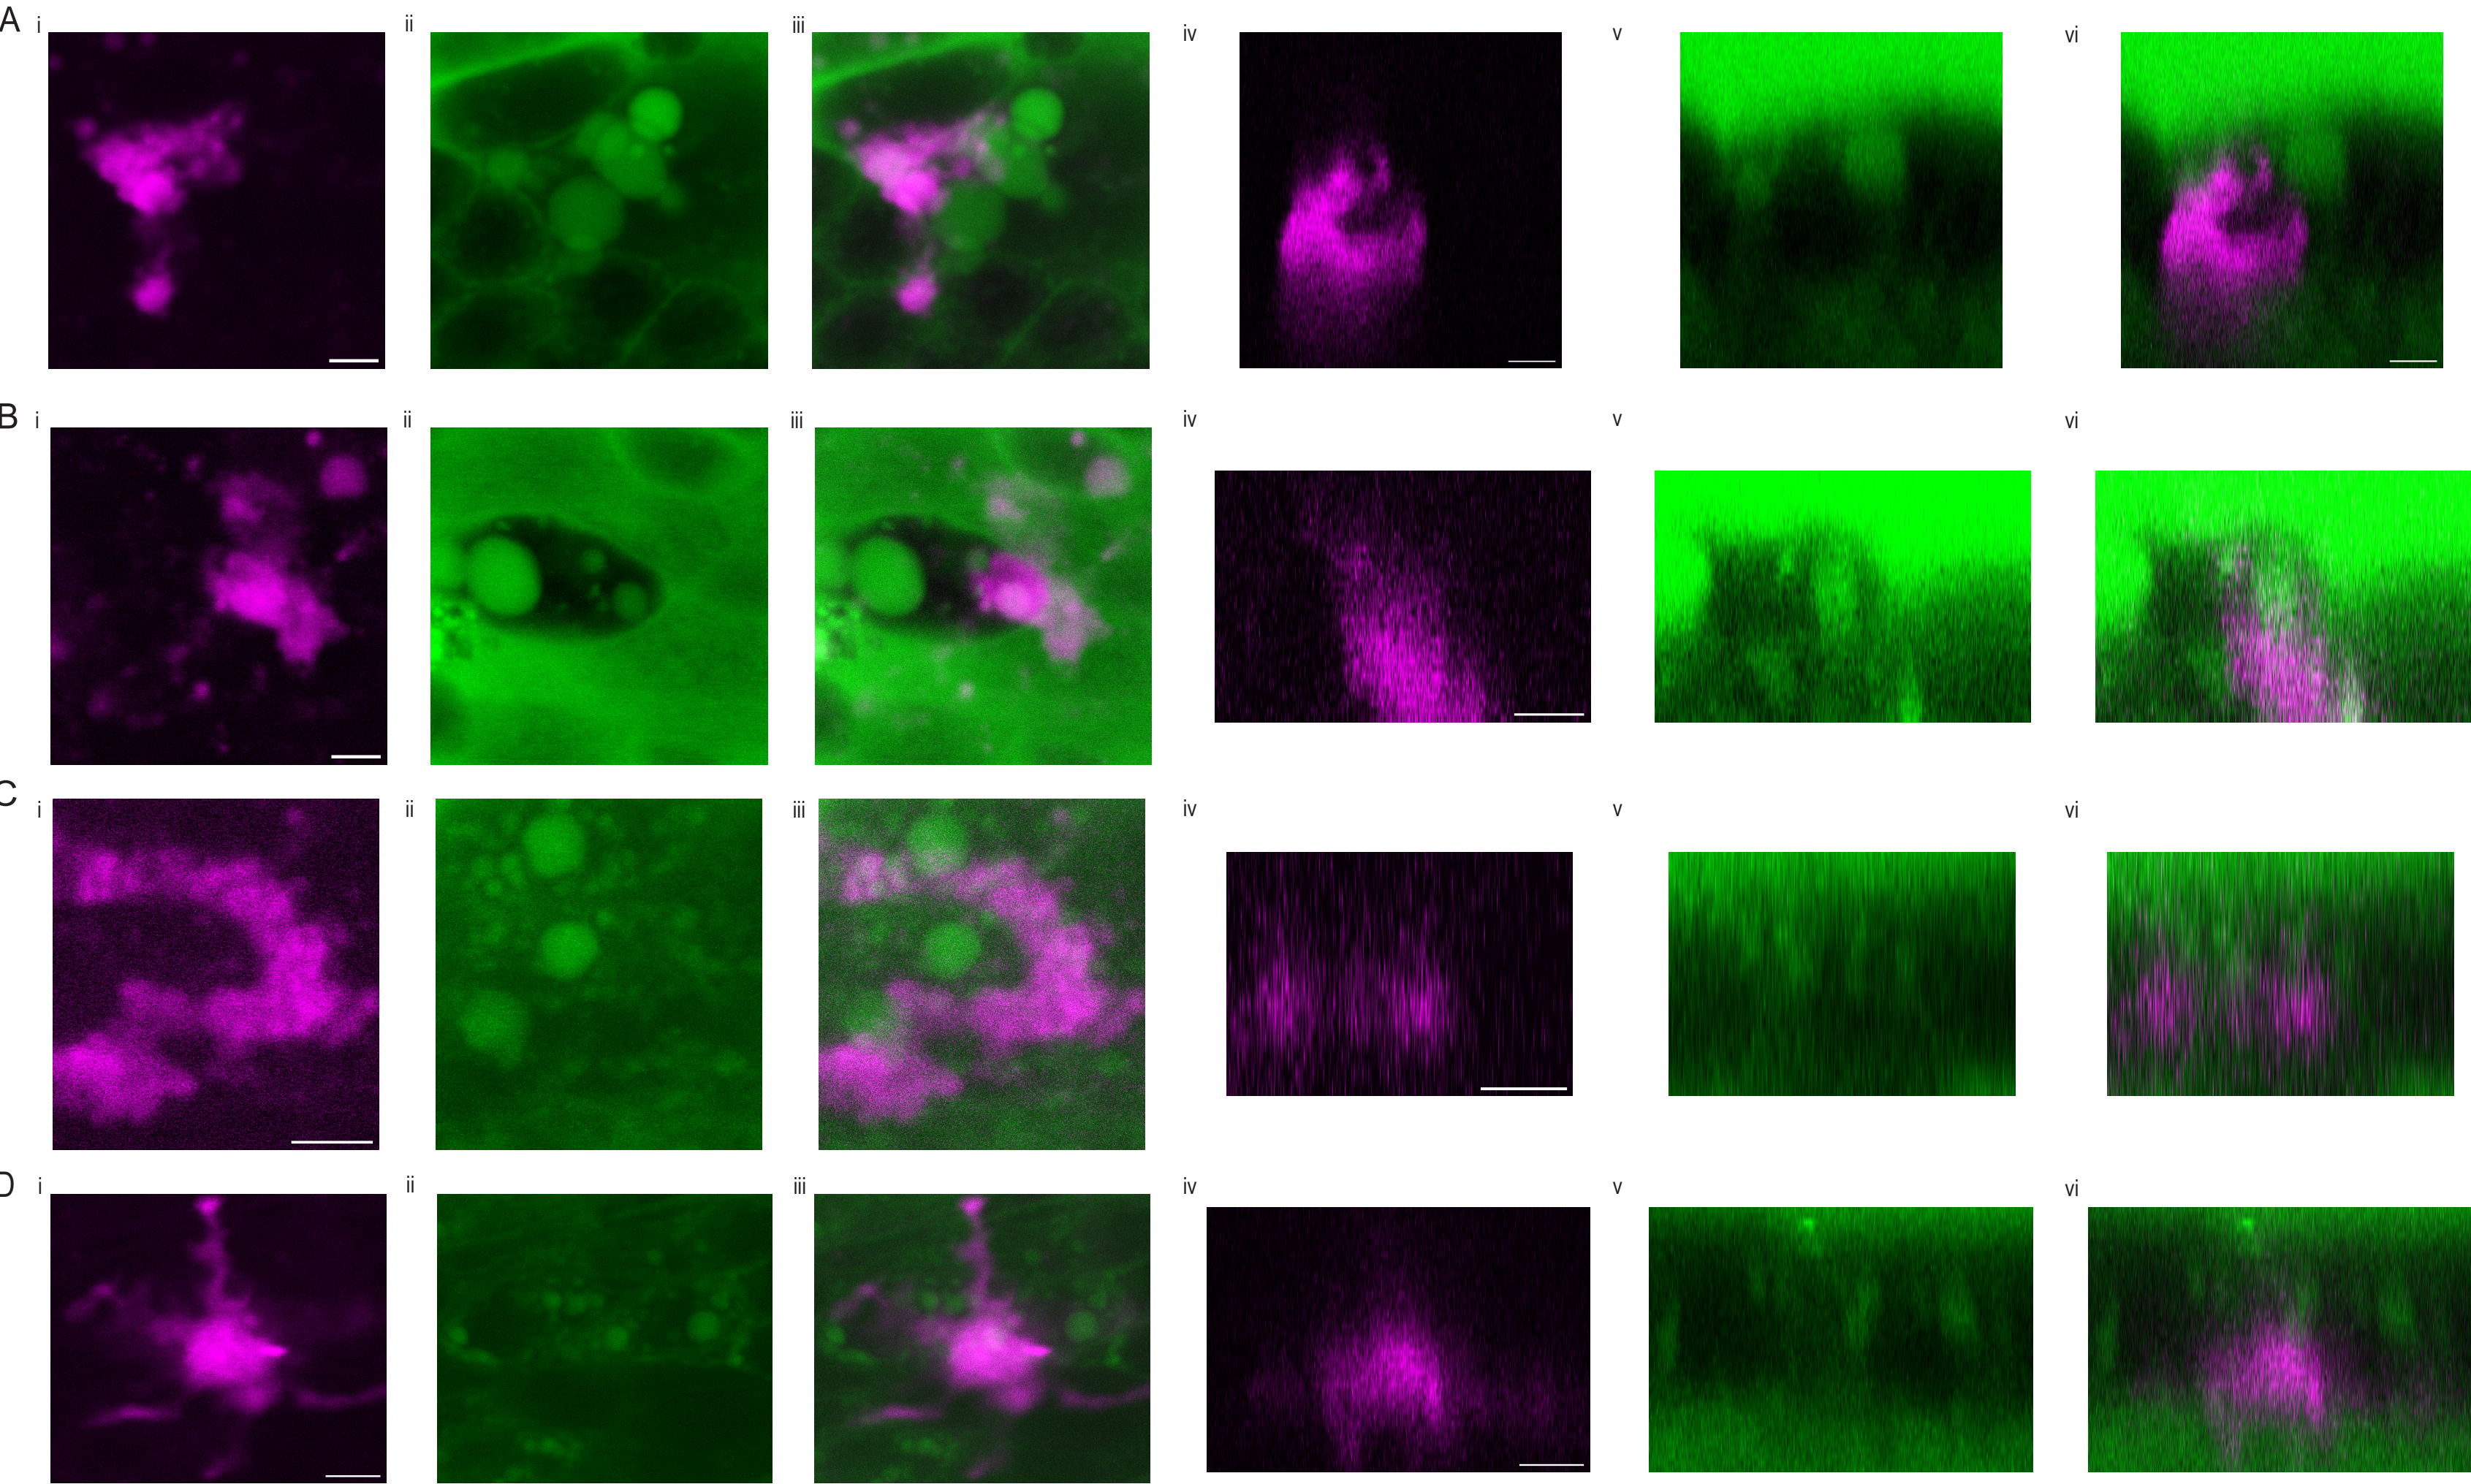

Supplement: supp [file elife-84375-supp-v1.zip]
