# Supplementary material for: Autofluorescence imaging permits label-free cell type assignment and reveals the dynamic formation of airway secretory cell associated antigen passages (SAPs)
Source: eLife journal article supplement (doi:10.7554/elife.84375), 2023-03-30
Supplement: supp [file elife-84375-supp-v1.zip › elife_poa_e84375_Figure_3_figure_supplement_1.pdf]

**Figure 3 Supplement 1**

|                                                                                  |                                                                                                            |                                                                                   |                                                                                                                                        |
|----------------------------------------------------------------------------------|------------------------------------------------------------------------------------------------------------|-----------------------------------------------------------------------------------|----------------------------------------------------------------------------------------------------------------------------------------|
| 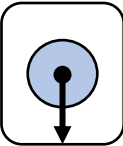 | <p><b>Nuclear position:</b><br/>Cross sectional view to measure center of nucleus to basement membrane</p> | <p><b>Y / Z</b></p>                                                               | <p><b>Aspect YZ:</b><br/>Y length / Z length</p>                                                                                       |
| 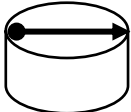 | <p><b>X length:</b><br/>Largest length in the XY plane</p>                                                 | 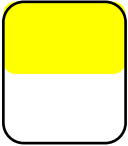 | <p><b>Standard deviation cell top:</b><br/>Standard deviation of autofluorescence ratio from midpoint above</p>                        |
| 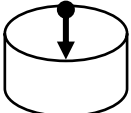 | <p><b>Y length:</b><br/>Smallest length in the XY plane</p>                                                | 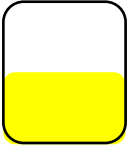 | <p><b>Standard deviation cell bottom:</b><br/>Standard deviation of autofluorescence ratio from midpoint below</p>                     |
| 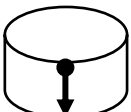 | <p><b>Z length:</b><br/>Largest length in Z-axis</p>                                                       | 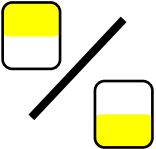 | <p><b>Ratio of deviation:</b><br/>standard deviation autofluorescence ratio top / standard deviation autofluorescence ratio bottom</p> |
| <p><b>X / Y</b></p>                                                              | <p><b>Aspect XY:</b><br/>X length / Y length</p>                                                           |                                                                                   |                                                                                                                                        |
