# Supplementary material for: Autofluorescence imaging permits label-free cell type assignment and reveals the dynamic formation of airway secretory cell associated antigen passages (SAPs)
Source: eLife journal article supplement (doi:10.7554/elife.84375), 2023-03-30
Supplement: supp [file elife-84375-supp-v1.zip › elife_poa_e84375_Figure_3_figure_supplement_4.pdf]

**Figure 3 Supplement 4**

**i** K-nearest Neighbors

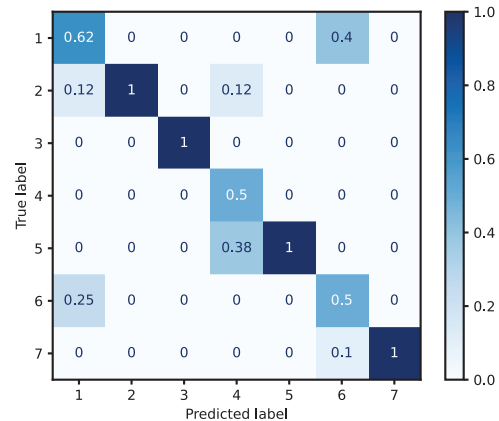

Training set Accuracy: 0.81  
Test set Accuracy: 0.77  
Matthews Correlation: 0.74

**ii** Multinomial Logistic Regression

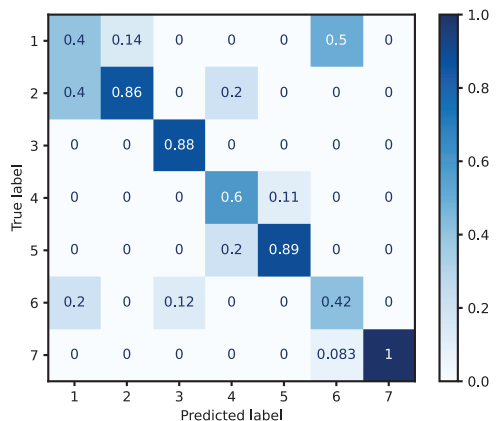

Training set Accuracy: 0.77  
Test set Accuracy: 0.71  
Matthews Correlation: 0.67

**iii** XGBoost

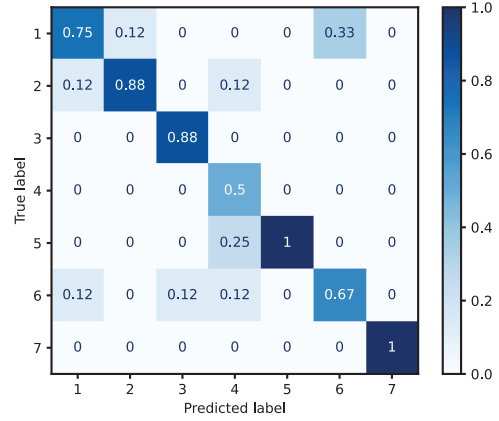

Training set Accuracy: 1.00  
Test set Accuracy: 0.80  
Matthews Correlation: 0.78
