# Supplementary material for: Autofluorescence imaging permits label-free cell type assignment and reveals the dynamic formation of airway secretory cell associated antigen passages (SAPs)
Source: eLife journal article supplement (doi:10.7554/elife.84375), 2023-03-30
Supplement: supp [file elife-84375-supp-v1.zip › elife_poa_e84375_Figure_3_source_data_1.xlsx]

## Sheet: Sheet4
Cell Type	Staining Marker	FAD	NADH	Ratio	Nuclear Position	X length	Y length	Z length	Aspect XY	Aspect YZ	Standard Deviation - Cell Top	Standard Deviation - Cell Bottom	Ratio of Deviation (Top/Bottom)
Basal	KRT5	219.965	130.118	0.62572	1.61667	10.7267	7.38803	3.81667	1.49292	1.96751	68.4581	70.9682	0.969755
Ciliated	AcTub	351.772	127.311	0.734578	7.0625	12.6945	6.84581	16.4375	2.01605	0.434027	176.069	77.1603	2.33583
Secretory	CCSP	377.554	804.187	0.326807	8.04688	12.4072	8.25928	18.0938	1.54413	0.460691	162.876	105.851	1.6525
Hillock	KRT13	155.014	110.186	0.600628	7.53333	15.3312	10.4008	4.76667	1.48312	2.28481	58.5849	58.5552	1.01396
Ionocyte	BSND	244.264	98.225	0.704081	4.64286	10.4617	6.65519	9.54762	1.60249	0.742958	212.117	71.2686	3.12951
Tuft	UEA1/GNAT3	240.971	119.374	0.66593	5.86667	18.2096	7.62267	10.0167	2.43887	0.773063	73.7597	79.2788	0.936576
Neuroendocrine	PGP9	133.505	88.0555	0.600464	3.67742	10.0155	7.20161	7.32258	1.41084	1.0331	70.1576	65.8406	1.07661
