# Supplementary material for: Autofluorescence imaging permits label-free cell type assignment and reveals the dynamic formation of airway secretory cell associated antigen passages (SAPs)
Source: eLife journal article supplement (doi:10.7554/elife.84375), 2023-03-30
Supplement: supp [file elife-84375-supp-v1.zip › elife_poa_e84375_Figure_5_figure_supplement_1.pdf]

## **Figure 5 Supplement 1**

XZ optical section of ALI cultures showing SAP formation and secretion of FITC-Dextran

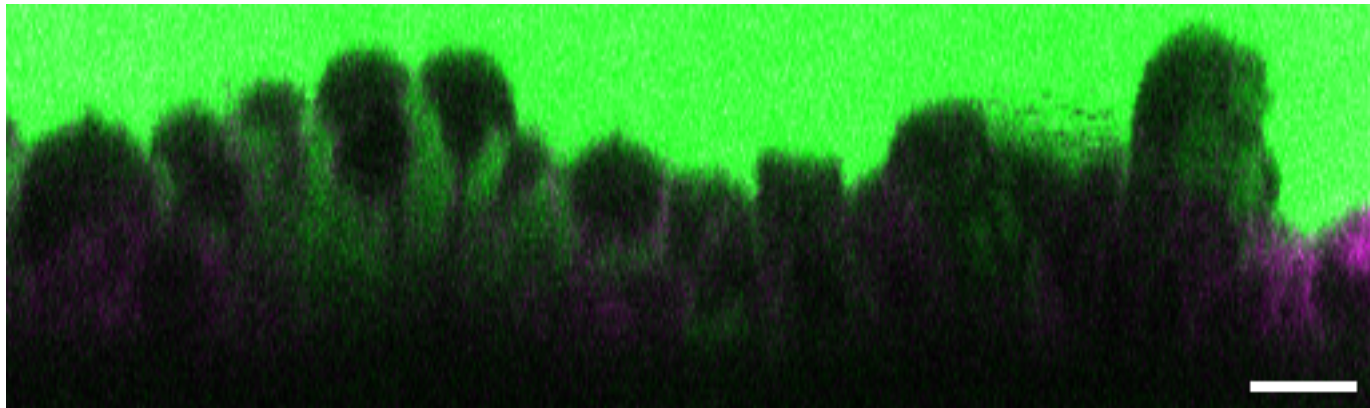

FITC-Dextran  
Membrane Tomato
