# Supplementary figures and images for: Autofluorescence imaging permits label-free cell type assignment and reveals the dynamic formation of airway secretory cell associated antigen passages (SAPs)
Source: eLife journal article supplement (doi:10.7554/elife.84375), 2023-03-30

**Figure 1 Supplement**

**A**

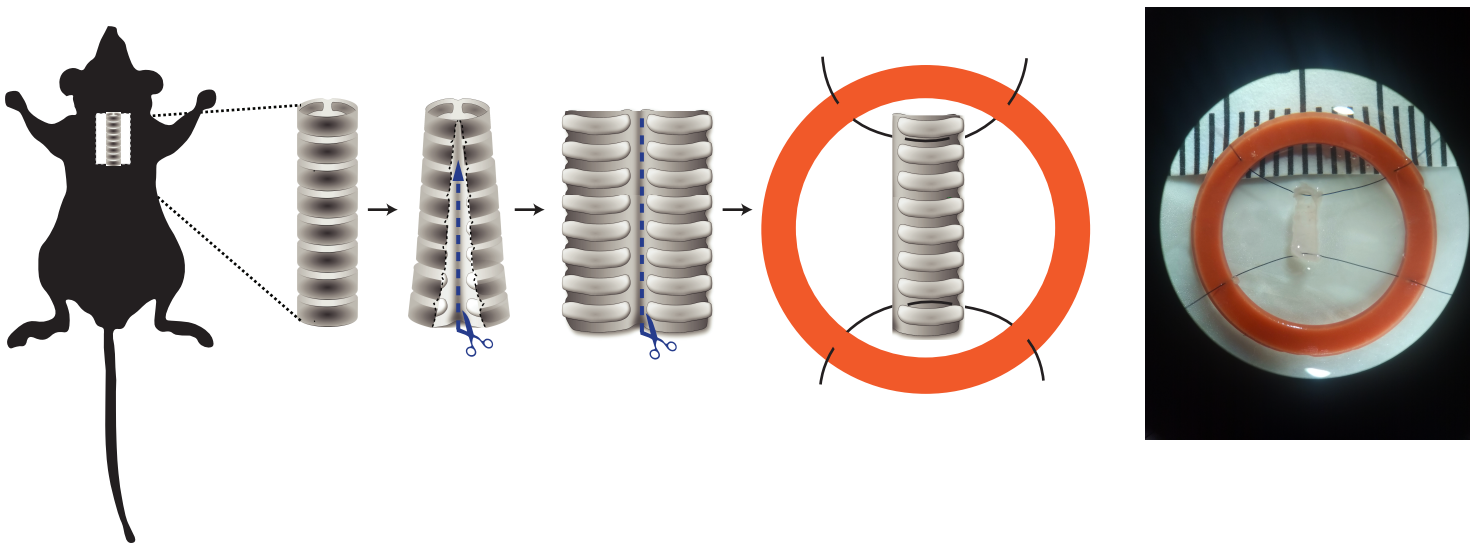

**B**

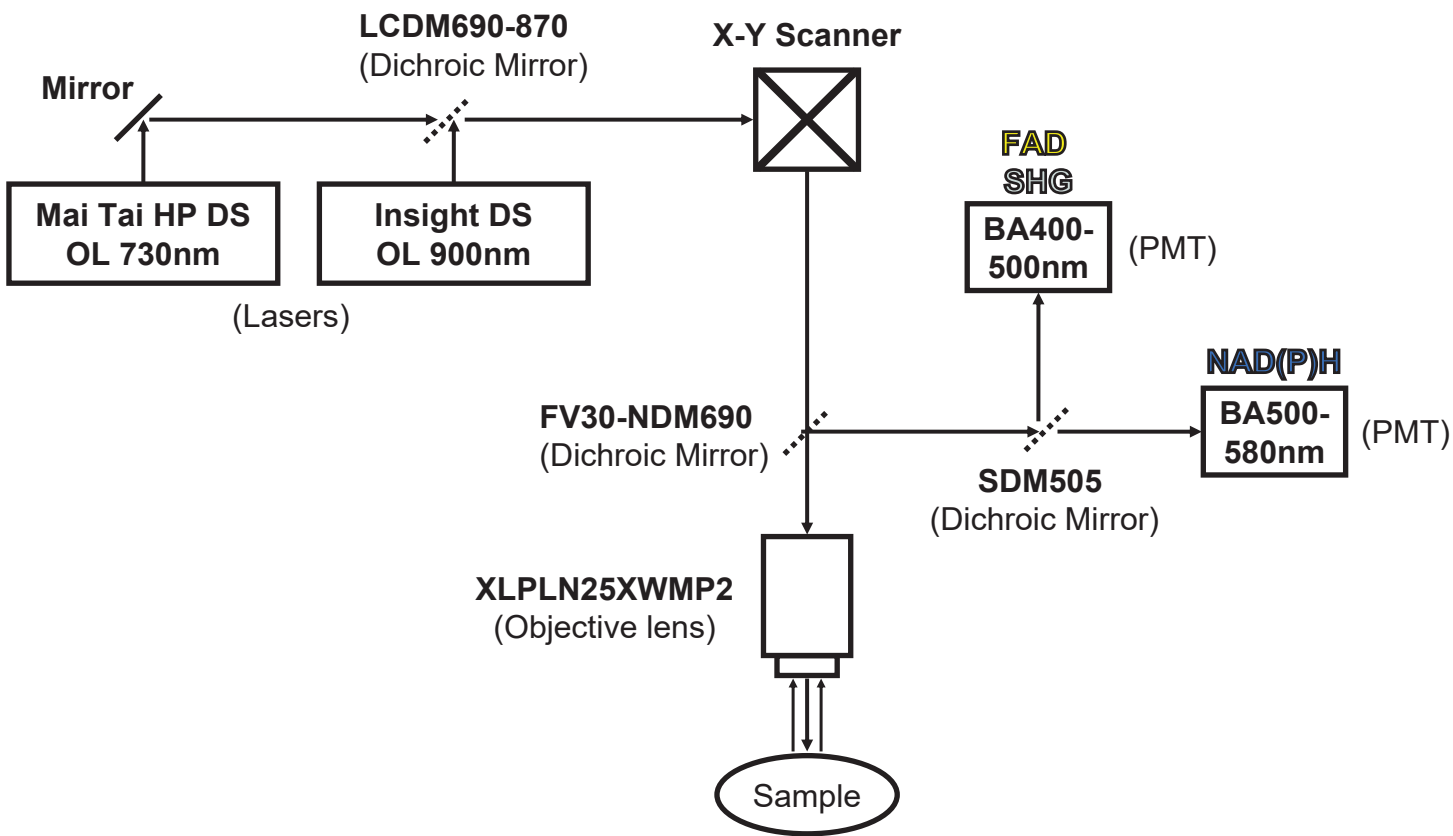

Supplement: supp [file elife-84375-supp-v1.zip › elife_poa_e84375_Figure_1_figure_supplement_1.pdf]

**Figure 2 Supplement 1**

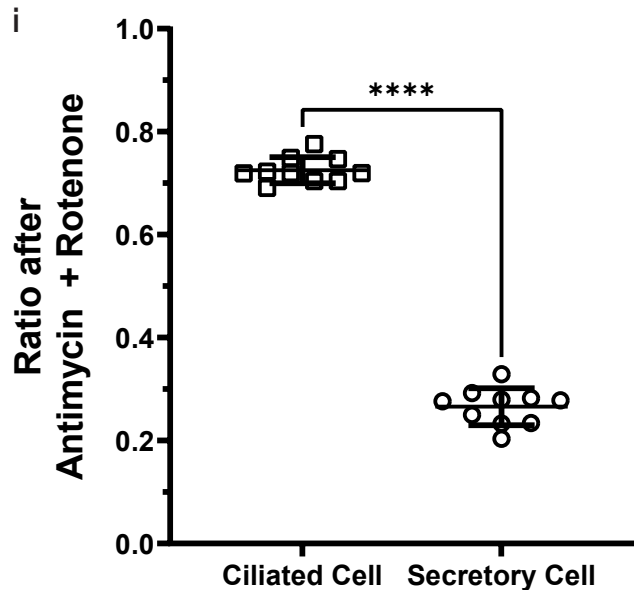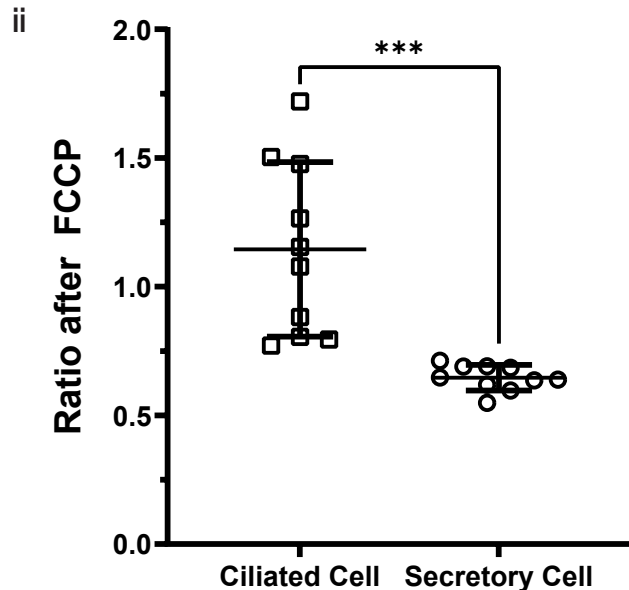

Supplement: supp [file elife-84375-supp-v1.zip › elife_poa_e84375_Figure_2_figure_supplement_1.pdf]

**Figure 3 Supplement 2**

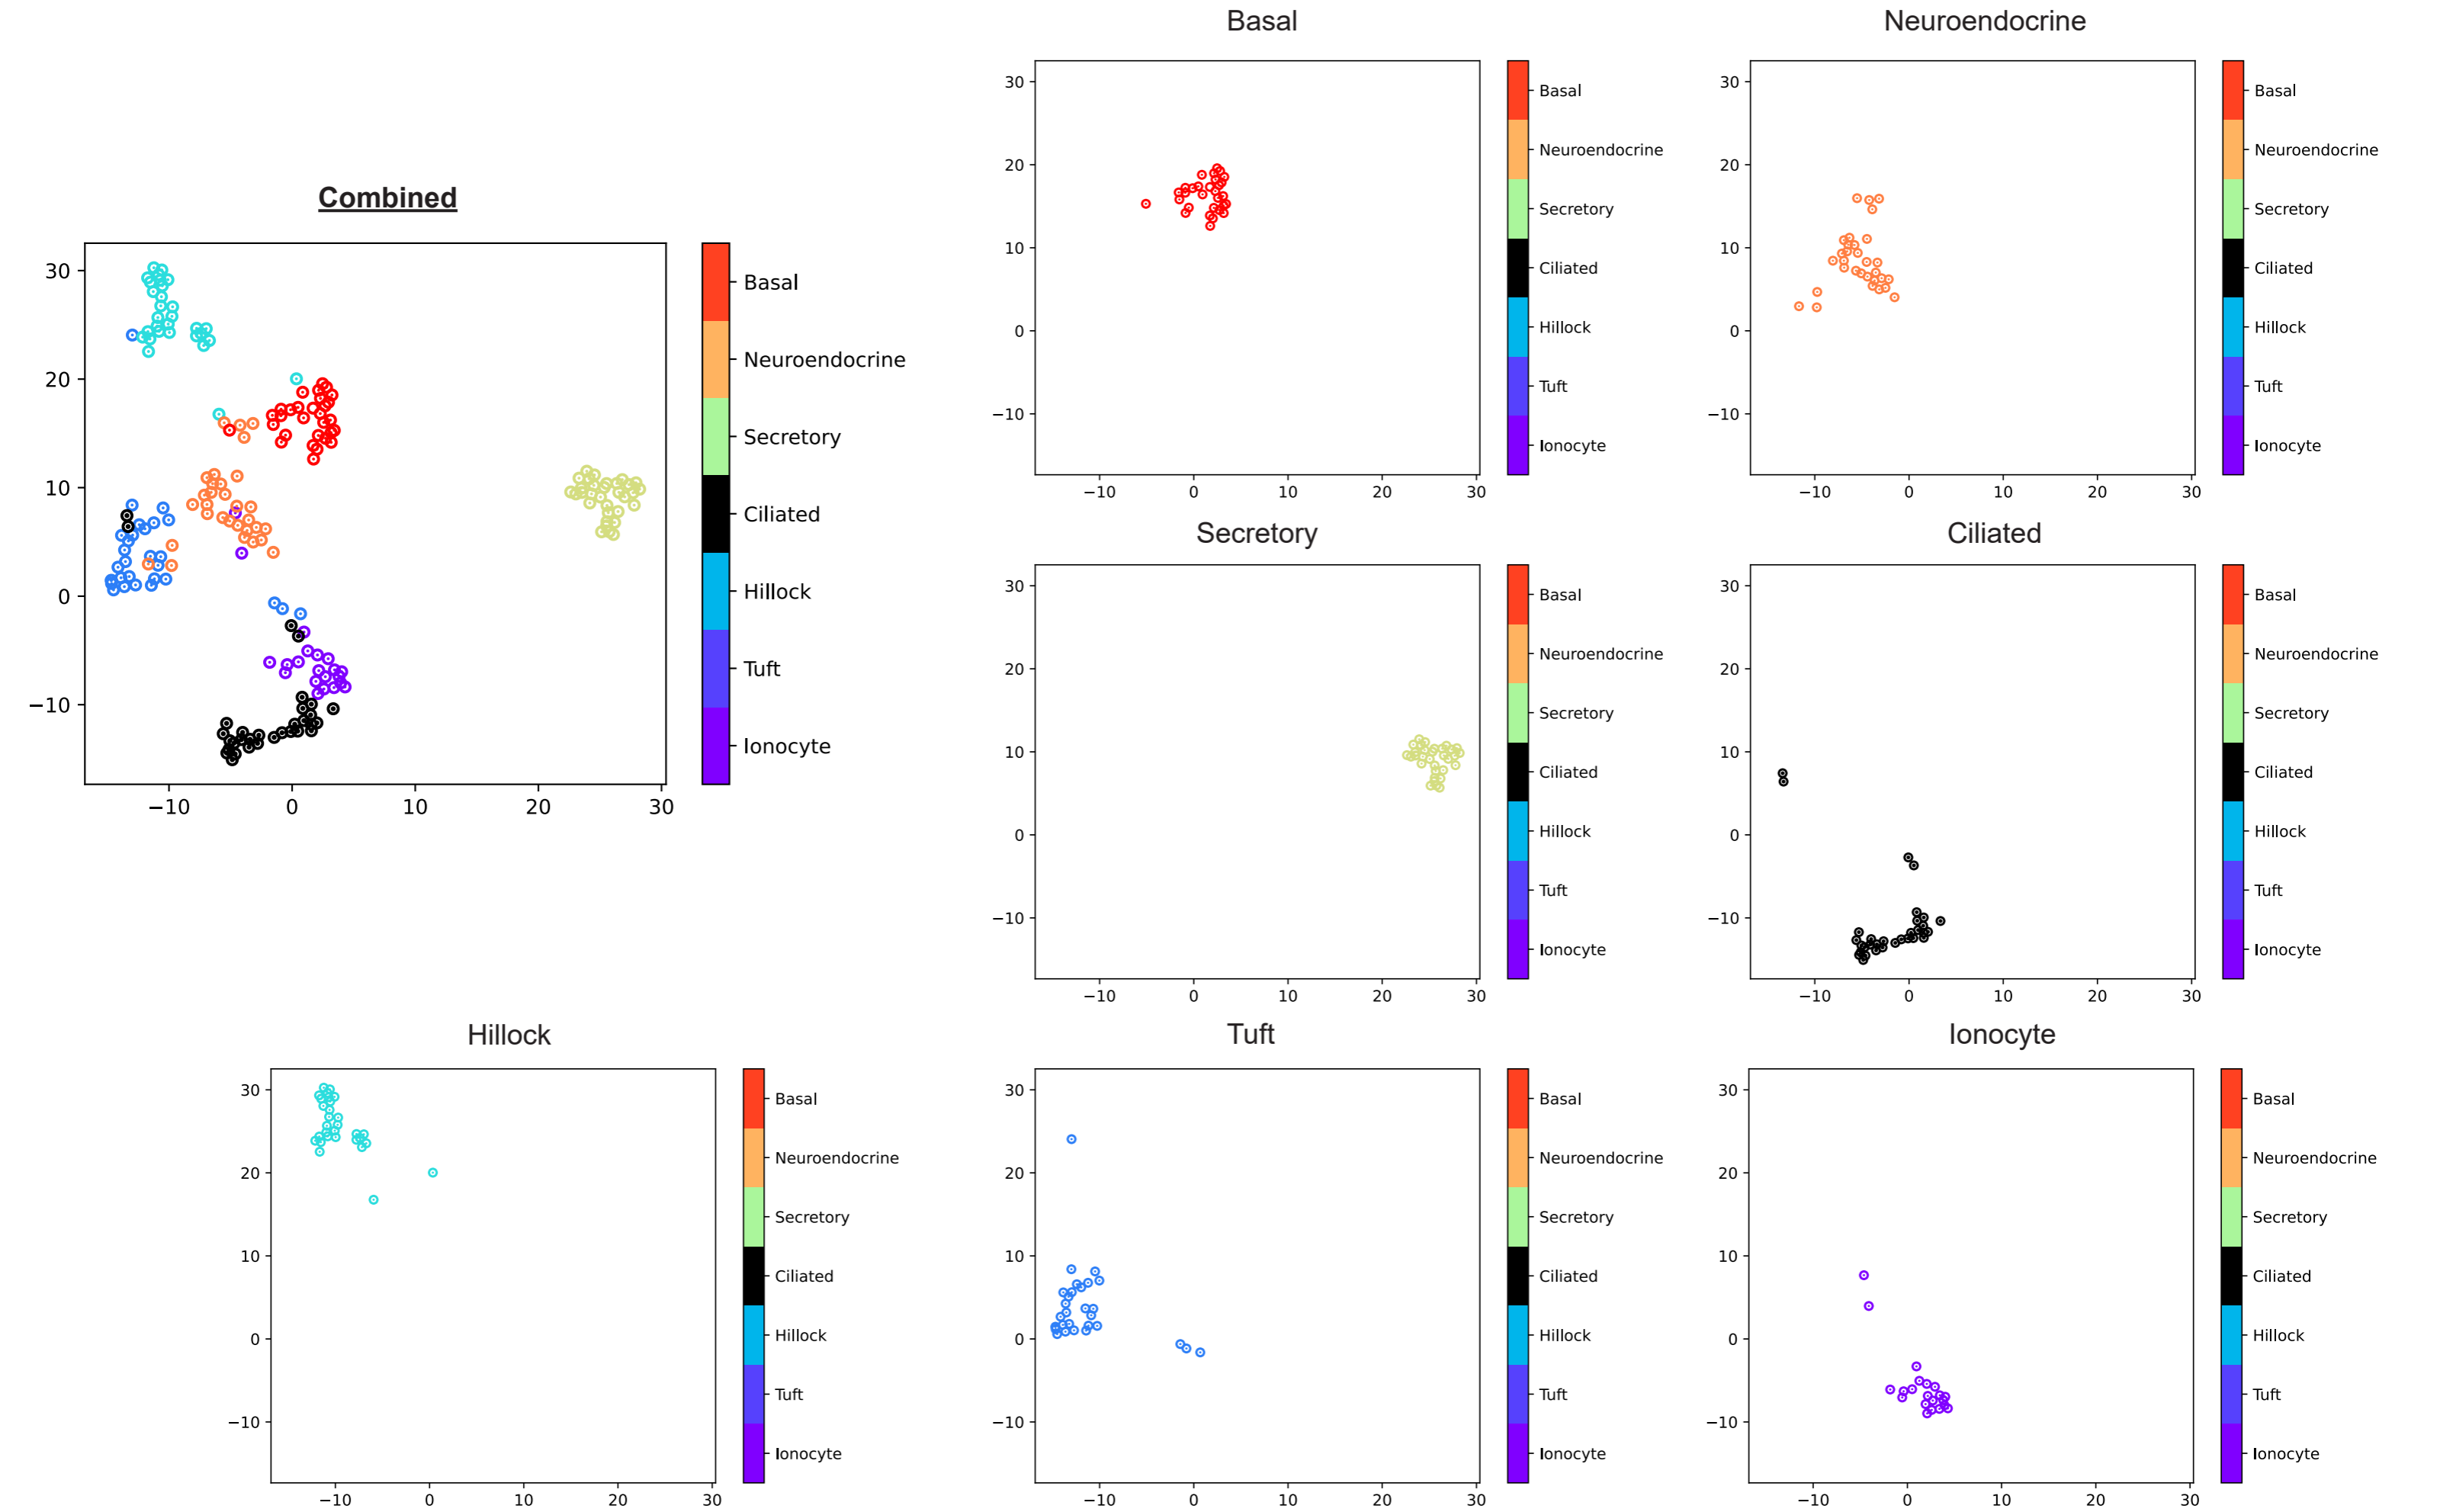

Supplement: supp [file elife-84375-supp-v1.zip › elife_poa_e84375_Figure_3_figure_supplement_2.pdf]

**Figure 5 Supplement 2**

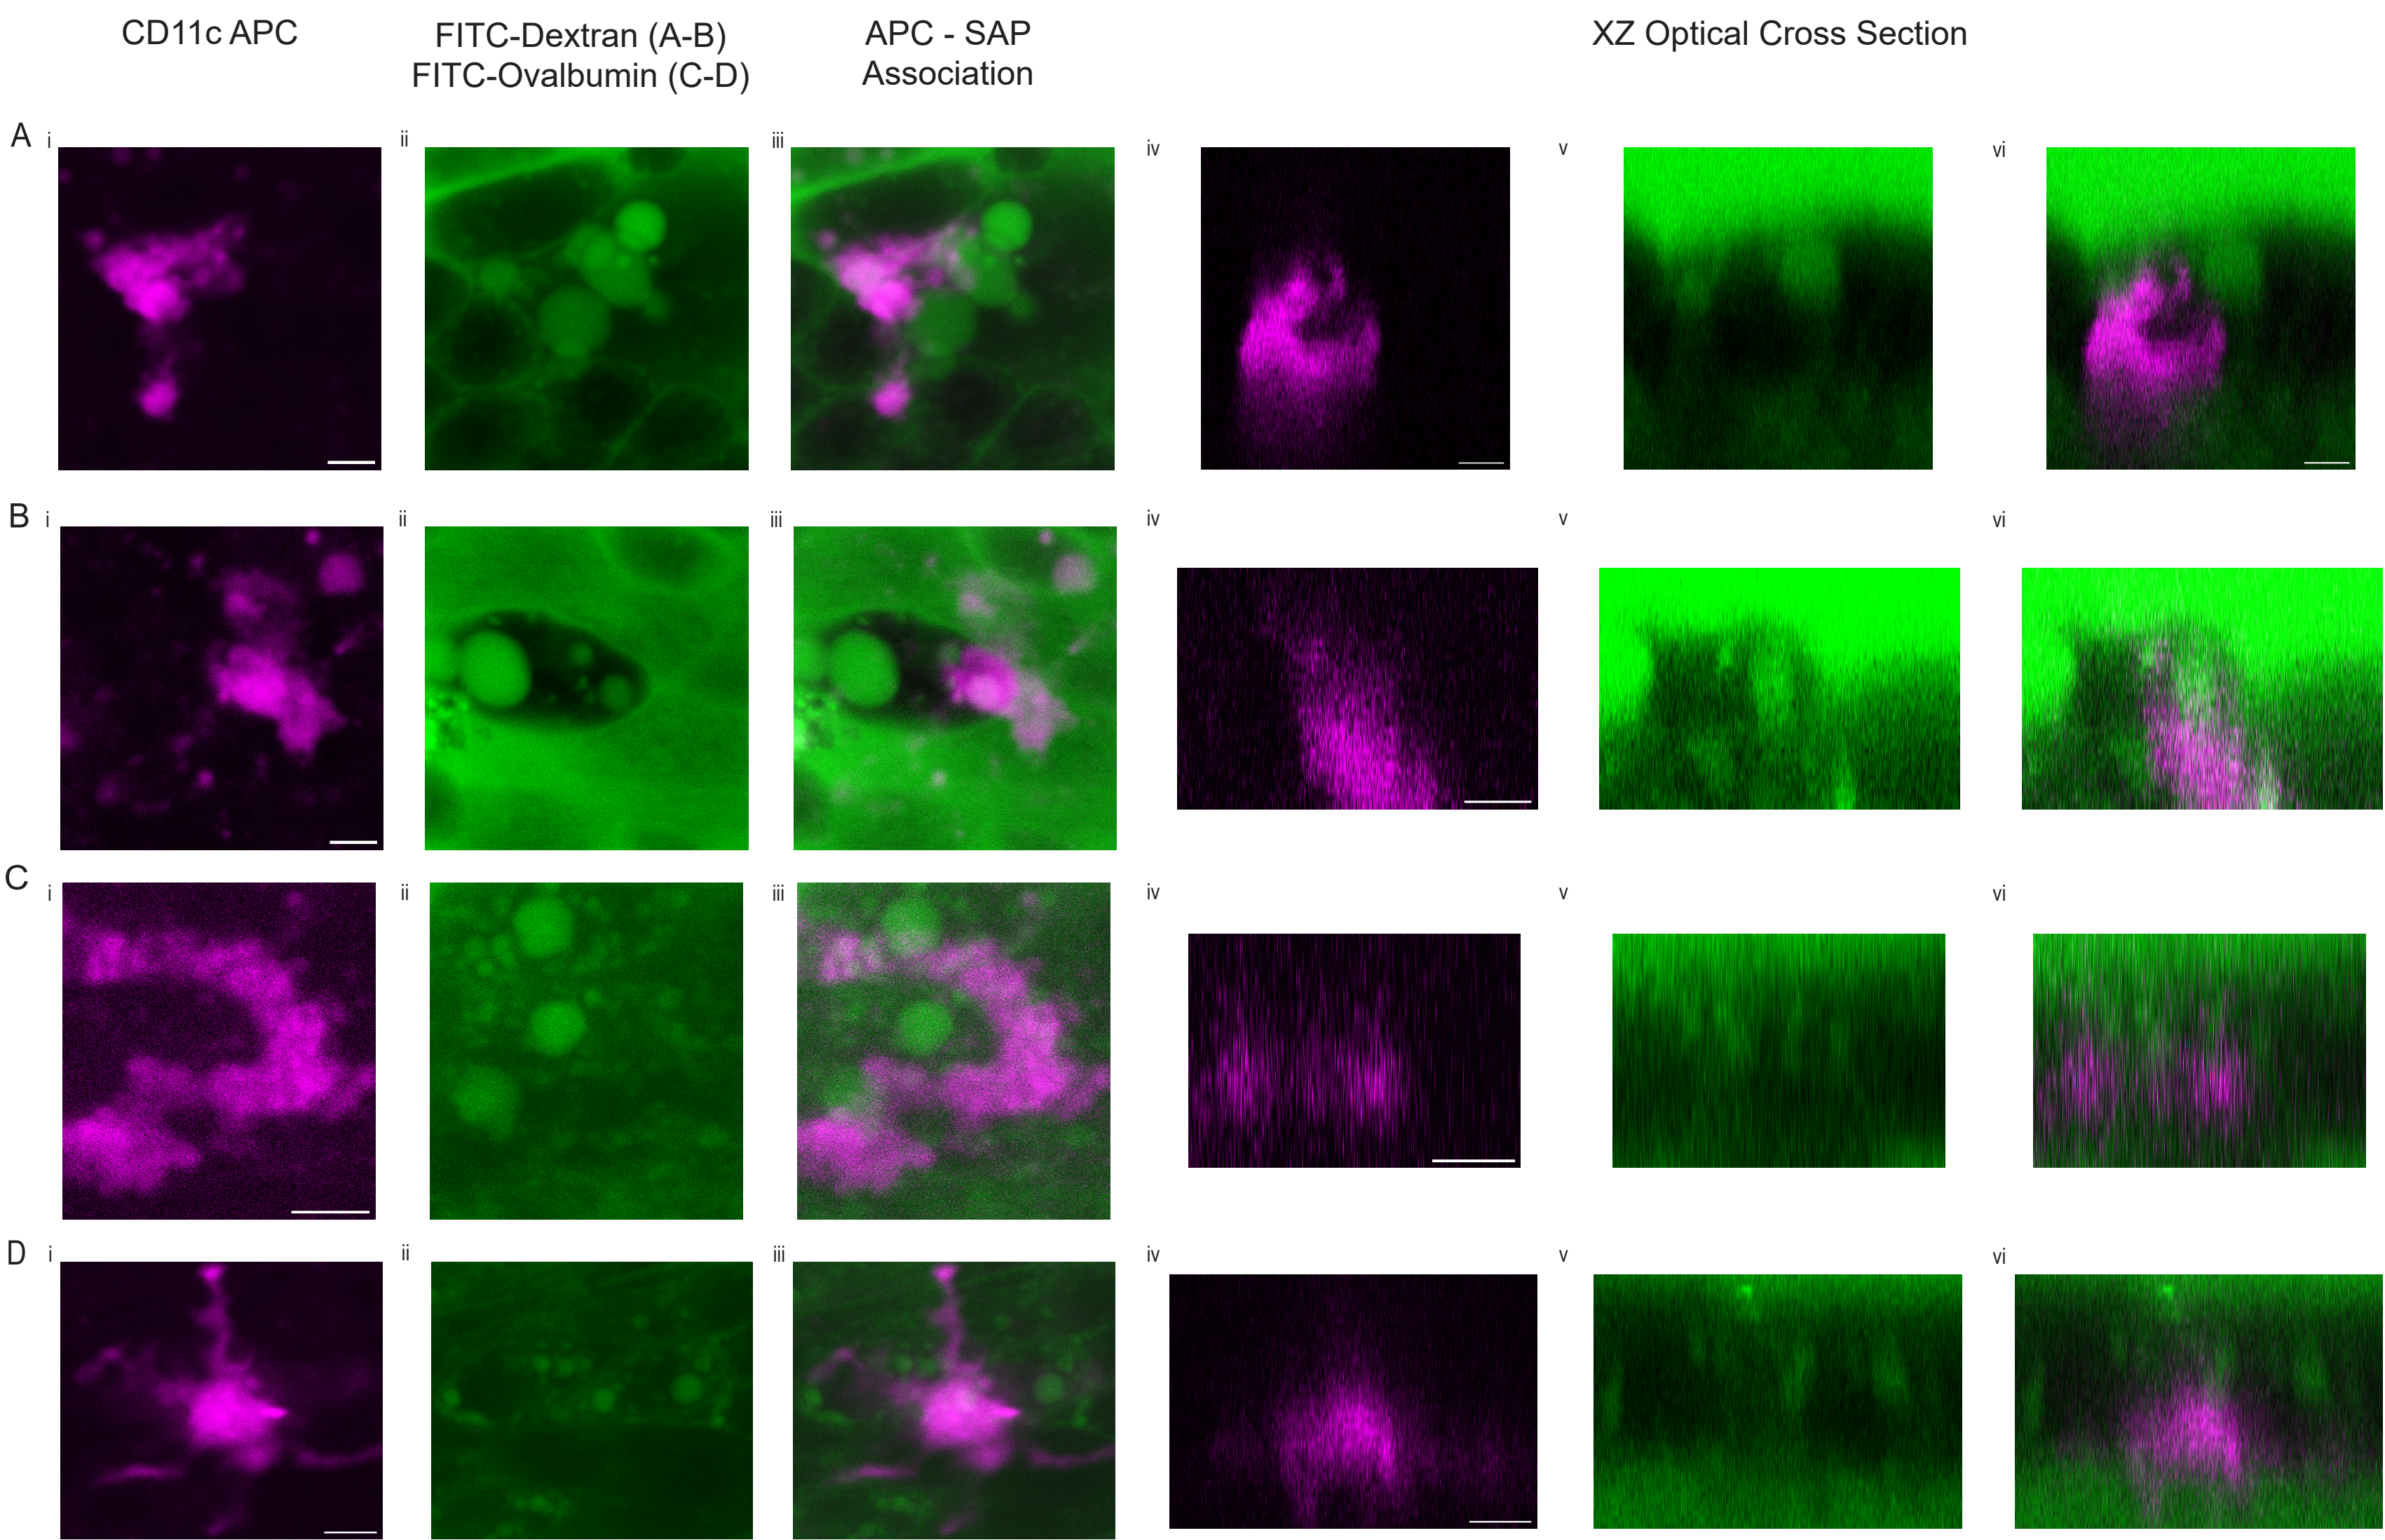

Supplement: supp [file elife-84375-supp-v1.zip › elife_poa_e84375_Figure_5_figure_supplement_2.pdf]
